# Supplementary material for: Gold nanoparticle superlattices: structure and cavities studied by GISAXS and PALS
Source: Royal Society of Chemistry journal article supplement (doi:10.1039/c6ra24241c), 2016-01-01
Supplement: c6ra24241c1.pdf [file c6ra24241c1.pdf]

# Electronic Supplementary Information

## Gold Nanoparticle Superlattices: Structure and Cavities Studied by GISAXS and PALS

Natalia Olichwer<sup>1</sup>, Tönjes Koschine<sup>2, #</sup>, Andreas Meyer<sup>1</sup>, Werner Egger<sup>3</sup>, Klaus Rätzke<sup>2, \*</sup> and  
Tobias Vossmeier<sup>1, \*</sup>

<sup>1</sup>Institute of Physical Chemistry, University of Hamburg, Grindelallee 117, 20146 Hamburg,  
Germany. \*E-mail: tobias.vossmeier@chemie.uni-hamburg.de

<sup>2</sup>Institute for Materials Science, Chair for Multicomponent Materials, Faculty of Engineering,  
Christian-Albrechts-University of Kiel, Kaiserstraße 2, D-24143 Kiel, Germany. \*E-mail:  
kr@tf.uni-kiel.de

<sup>#</sup>Current address: Centre for Surface Chemistry and Catalysis, KU Leuven, Celestijnenlaan  
200f, 3001 Leuven, Belgium

<sup>3</sup>Institut für Angewandte Physik und Messtechnik, Universität der Bundeswehr München,  
Werner-Heisenberg-Weg 39, 85579 Neubiberg, Germany

### \*Corresponding Authors

E-mail: tobias.vossmeier@chemie.uni-hamburg.de; kr@tf.uni-kiel.de

## XPS measurements

The synthesis of 1-dodecanethiol (DDT)-stabilized GNPs is based on the reduction of chloro(triphenylphosphine)gold(I) with *tert*-butylamine borane complex in the presence of DDT. The as-synthesized particles were purified by precipitation with ethanol. For reliable PALS measurements a quantitative elimination of nitrogen compounds is required, as these have been shown to quench positronium<sup>1,2</sup>. As confirmed by XPS measurements and elementary analysis (detection limit of 0.5 %) the samples prepared and purified as described in the experimental section did not reveal any contamination with nitrogen compounds (see XPS spectra below, Figure S1).

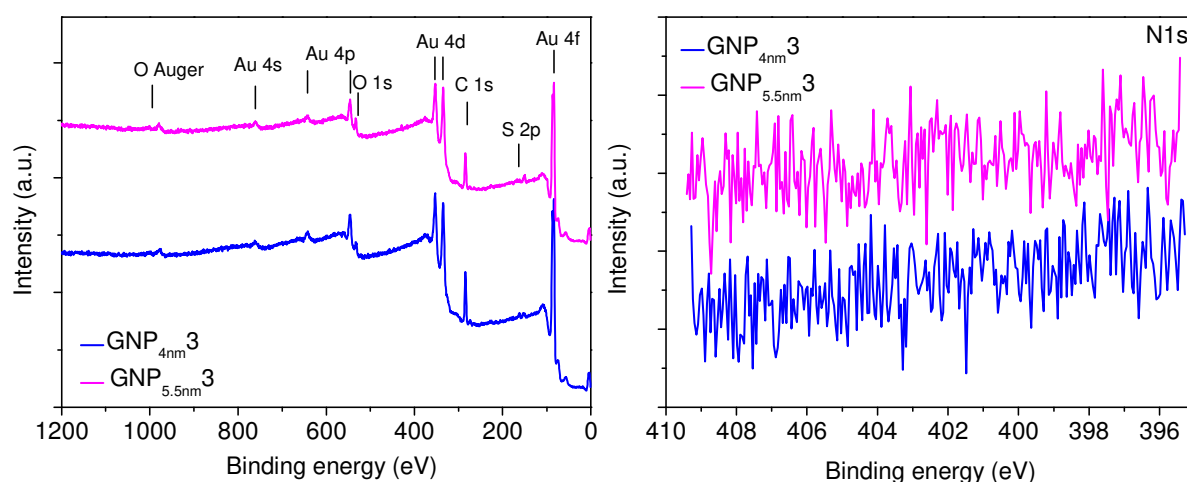

**Figure S1:** XPS spectra (left: survey, right: N region) of GNP superlattice films prepared from sample GNP<sub>4 nm</sub>3 (blue) and GNP<sub>5.5 nm</sub>3 (magenta). In the survey spectra the expected signals for the elements Au, C and S and some O (due to the exposure to atmosphere prior to the XPS measurements) are observed. The absence of a peak in the energy range between 395 to 410 eV reveals that no nitrogen compounds were detectable.

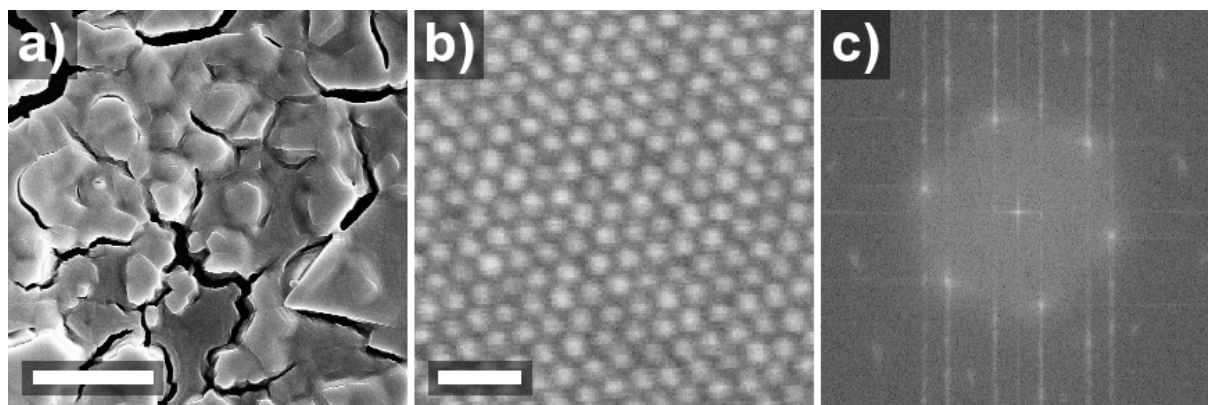

**Figure S2:** a), b) SEM images of samples GNP<sub>5.5 nm</sub>1 shown at two different magnifications and c) the Fourier transform of the SEM image presented in Figure part b). The scale bars are 10  $\mu\text{m}$  in a) and 20 nm in b).

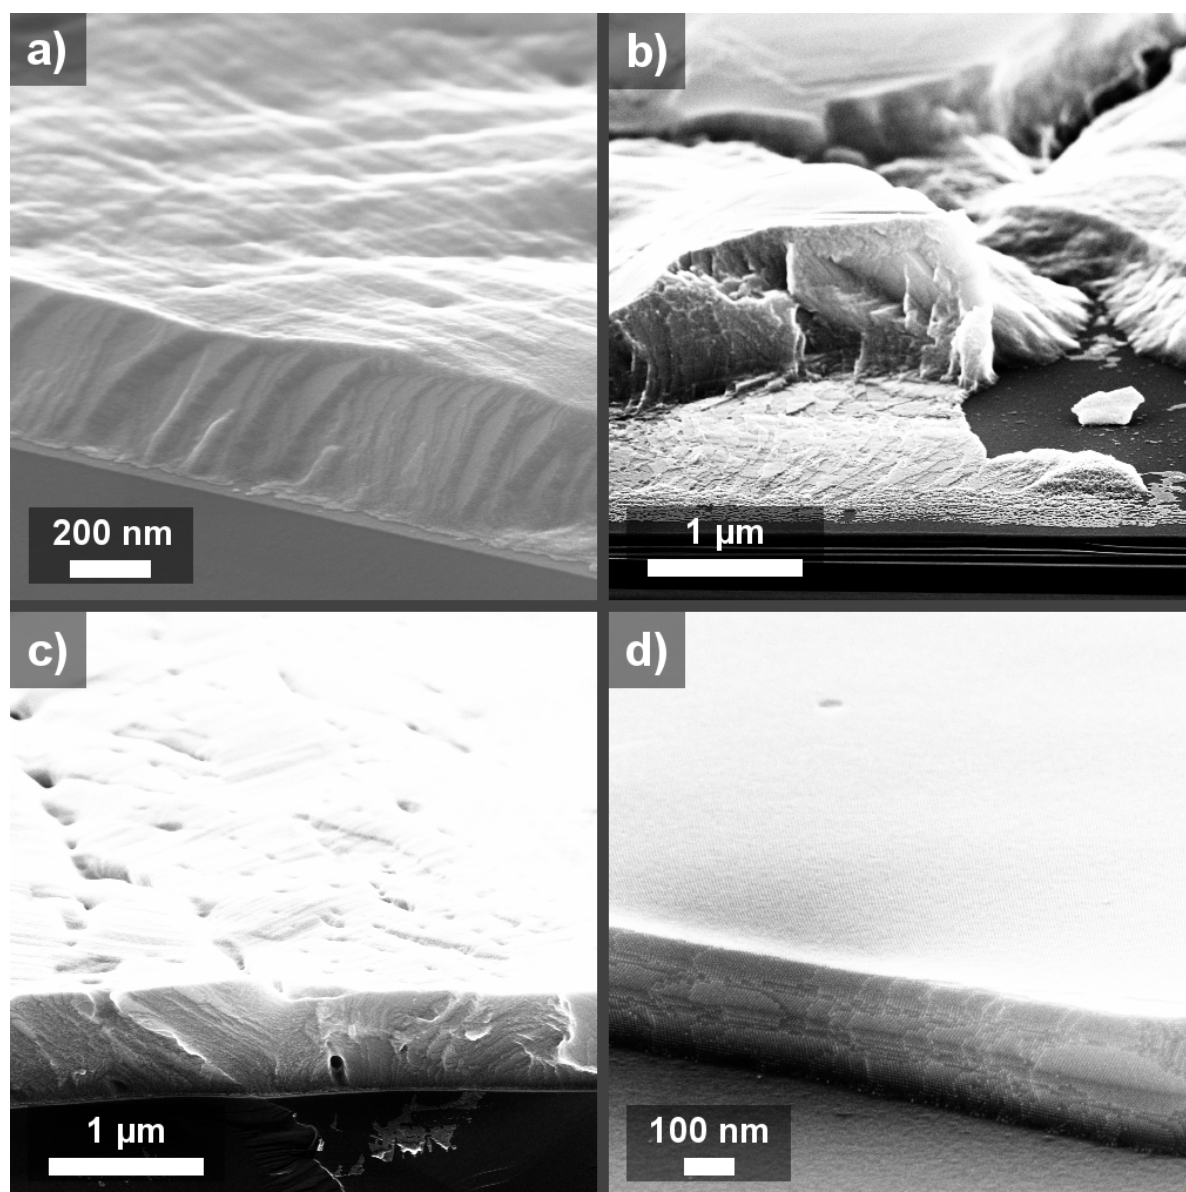

**Figure S3:** Representative SEM images of samples a) GNP<sub>4 nm</sub>1, b) GNP<sub>5.5 nm</sub>1, c) GNP<sub>4 nm</sub>2, and d) GNP<sub>5.5 nm</sub>2 providing cross-sectional views of the cleaved samples.

## Calculation of gold content

$$n_{\text{Au}} = \frac{m_{\text{Au}}}{m_{\text{Au}} + m_{\text{DDT}}}$$

$$m_{\text{Au}} = f_{\text{Au}} \cdot \rho_{\text{Au}}$$

$$f_{\text{Au}} = \frac{r^3}{r_{\text{eff}}^3} \cdot 0.74$$

$$r_{\text{eff}} = r + \frac{\delta}{2}$$

$$m_{\text{DDT}} = f_{\text{DDT}} \cdot \rho_{\text{DDT}}$$

$$f_{\text{DDT}} = 1 - f_{\text{Au}}$$

with

$n_{\text{Au}}$ : mass/mass fraction of gold

$m_{\text{Au}}$ : mass/volume fraction of gold

$m_{\text{DDT}}$ : mass/volume fraction of DDT

$f_{\text{Au}}$  respectively  $f_{\text{DDT}}$ : volume/volume fraction of gold respectively DDT

$\rho_{\text{DDT}}$ : density of DDT (0.845 g/cm<sup>3</sup>)

$\rho_{\text{Au}}$ : density of gold (19.32 g/cm<sup>3</sup>)

$r$ : radius of the gold cores (from TEM measurements)

$\delta$ : interparticle edge-to-edge distance obtained by subtracting the TEM-diameter of the gold cores from the center-to-center nearest neighbor distance determined by GISAXS

## References

- 1 O. E. Mogensen, in *Springer Series in Chemical Physics*, ed. V. I. Goldanskii, Springer-Verlag, Berlin, Heidelberg, 1995, vol. 58.
- 2 Y. C. Jean, P. E. Mallon and D. M. Schrader, *Principles and Applications of Positron and Positronium Chemistry*, World Scientific, New Jersey London Singapore Hong Kong, 2003.
